# Supplementary material for: The Quantitative Basis of the Arabidopsis Innate Immune System to Endemic Pathogens Depends on Pathogen Genetics
Source: PLoS Genet. 2016 Feb 11;12(2):e1005789. doi: 10.1371/journal.pgen.1005789 (PMC4750985; doi:10.1371/journal.pgen.1005789)
Supplement: S1 Table — Summary table describing the total number SNPs and genes tested and associated with each phenotype within the different B. cinerea isolate treatments. (XLSX) [file pgen.1005789.s015.xlsx]

## Sheet: Sheet1
Table S1: Summary of Mapping Results
	Camalexin							Lesion Area
	Apple517	B05.10	Ctrl	Supersteak	UKRazz	Total Unique		Apple517	B05.10	Supersteak	UKRazz	Total Unique
Total number of SNPs tested	115301	115301	115301	115301	115301	115301		115301	115301	115301	115301	115301
Number of sig. SNPs	5287	6828	4802	8240	4204	20476		6576	5995	5342	5713	23199
Total number of Genes tested	19352	19352	19352	19352	19352	19352		19352	19352	19352	19352	19352
Number of sig. Genes	482	693	513	827	374	1613		628	506	520	475	1732
Average number of sig SNPs per sig. Gene	2.92067	2.95936	2.89546	2.8782	2.96206			3.04968	2.95618	2.86187	2.94658
Maximum number of sig SNPs per gene	14	17	14	15	15			14	21	15	17
